# Supplementary material for: RACK1 MARylation regulates translation and stress granules in ovarian cancer cells
Source: PubMed Central journal article supplement (PMC11702359; doi:10.1083/jcb.202401101), 2025-01-06

Fig. 6 - Challa *et al.* (2024) - Raw Data

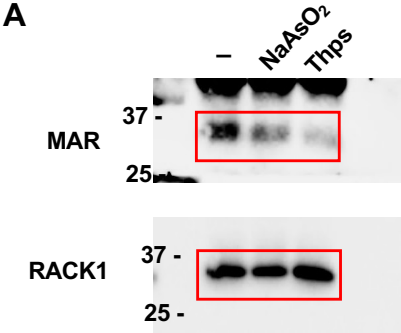

Supplement: jcb_202401101_sourcedataf6.pdf [file jcb_202401101_sourcedataf6.pdf]
