# Supplementary material for: RACK1 MARylation regulates translation and stress granules in ovarian cancer cells
Source: PubMed Central journal article supplement (PMC11702359; doi:10.1083/jcb.202401101), 2025-01-06

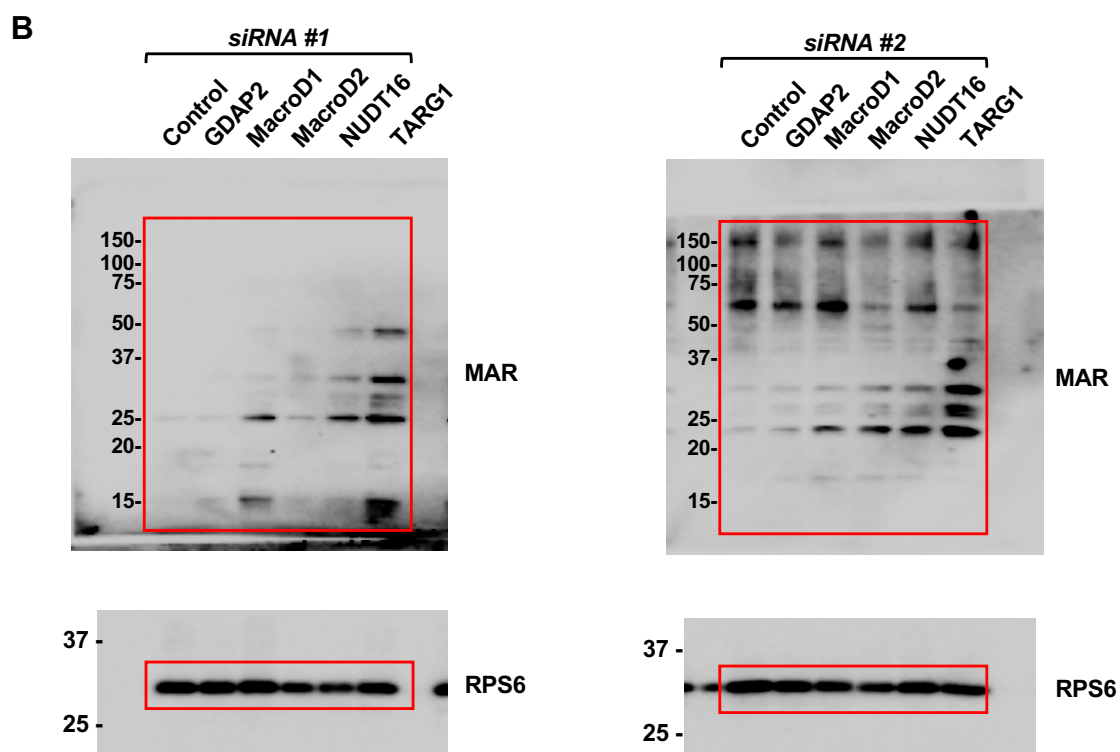

Supplement: jcb_202401101_sourcedatafs4.pdf [file jcb_202401101_sourcedatafs4.pdf]
